# Supplementary material for: Feasibility and Acute Toxicity of Hypo-Fractionated Radiotherapy on 0.35T MR-LINAC: The First Prospective Study in Spain
Source: MDPI journal article supplement (doi:10.3390/cancers16091685), 2024-04-26
Supplement: s1 [file s1]

## Supplementary Materials

**Table S1.** Hypo-fractionated MRgRT fractionation protocol scheme. Abbreviations: Fx = fractions; AD = alternate days; D = daily.

| Localization                                                                                                                                            | Dose                                                                                                                                                                                        | Target Volume                                                                                                                                    |
|---------------------------------------------------------------------------------------------------------------------------------------------------------|---------------------------------------------------------------------------------------------------------------------------------------------------------------------------------------------|--------------------------------------------------------------------------------------------------------------------------------------------------|
| <b>Prostate</b><br>Low Risk and Intermediate favorable risk<br><br>Intermediate unfavorable risk and High risk<br><br>Prostate Bed<br><br>Reirradiation | 36,50Gy in 5 fx (AD)<br>60 Gy in 20 fx(D)<br><br>40Gy in 5 fx (AD)<br><br>32,50 in 5 fx (AD)<br><br>30 in 5 fx (AD)                                                                         | Prostate<br>Prostate (Volumen > 100 cc)<br><br>Prostate and 2cm Seminal Vesicles<br><br>Prostate bed                                             |
| <b>Pancreas</b><br><br><br><b>Reirradiation</b>                                                                                                         | 30- 50Gy in 5 fx (D)<br>36 Gy in 15 fx (D)<br><br>25- 35 Gy in 5 fx (D)                                                                                                                     | Pancreatic tumor +/- clinical elective volume ( vascular structure within 5 mm, clinical node positive,...)<br><br>Pancreatic Tumor and/ or node |
| <b>NSCLC</b><br><b>Peripheral Tumor</b><br><br><br><b>Central Tumor</b><br><b>Ultra Central Tumor</b>                                                   | 45-60 Gy in 3 fx (AD)<br>48-50 Gy in 4 fx (AD)<br>50-60 Gy in 5 fx (AD)<br>28-34 Gy in 1 fx<br><br>50- 55 Gy in 5 fx (AD)<br>60 Gy in 8 fx (AD)<br>50 Gy in 10 fx (D)<br>60 Gy in 12 fx (D) | Lung Tumor                                                                                                                                       |
| <b>Liver</b>                                                                                                                                            | 45-60 Gy in 3 fx (AD)<br>40- 50Gy in 5 fx (AD)<br>30 Gy in 10 fx (AD)                                                                                                                       | Liver Tumor                                                                                                                                      |
| <b>Adrenal gland</b>                                                                                                                                    | 36Gy in 3 fx                                                                                                                                                                                | Adrenal gland                                                                                                                                    |

**Table S2.** Organs at Risk Constraints protocol for five fractions.

| Structure          | Volume to dose                      | (Gy)                       | Max (Gy) | Mean (Gy) |
|--------------------|-------------------------------------|----------------------------|----------|-----------|
| Esophagus          | ≤5cc                                | 32,5                       | 38       |           |
| Heart              | ≤15cc                               | 32                         | 38       |           |
| Aorta              | ≤10cc                               | 47                         | 53       |           |
| Great Vessels      | ≤10cc                               | 47                         | 53       |           |
| Trachea            | ≤5cc                                | 45                         | 50       |           |
| Bronchus           | ≤5cc<br>≤0,04cc                     | 45<br>50                   | 50       |           |
| Chestwall          | ≤5cc                                | 45                         | 57       |           |
| Lung Total         | ≤950cc<br>≤37%                      | 12,5<br>13,5               |          |           |
| Duodenum           | <9cc<br><3cc<br><1cc                | 15<br>20<br>33             |          |           |
| Liver              | <50%                                | 12                         |          |           |
| Stomach            | <50%<br><1cc                        | 12<br>33                   |          |           |
| Spinal Cord        | <1cc                                | 8                          |          |           |
| Kidney             | <200cc                              | 17,5                       |          |           |
| Bowel (Pancreas)   | <5cc                                | 19                         |          |           |
| Inferior Vena Cava |                                     |                            | 30       |           |
| Rectum             | <50%<br><50%<br><20%<br><10%<br><5% | 20<br>24<br>32<br>36<br>40 | 42       |           |
| Bowel (Prostate)   | <30cc<br><1cc                       | 20<br>30                   |          |           |

|                     |                    |                |    |     |
|---------------------|--------------------|----------------|----|-----|
| <b>Bladder</b>      | <40%<br><5%<br><2% | 20<br>40<br>39 | 42 |     |
| <b>Femoral Head</b> | <10cc              | 20             |    |     |
| <b>Penile Bulb</b>  | <5%                | 24,8           |    | <16 |
| <b>PRV Urethra</b>  |                    |                | 42 |     |
